# Supplementary material
Source: Springer Nature journal article supplement (https://www.springermedizin.de/resource/supplementary/12913_2007_495_MOESM2_ESM.pdf/9534876)

### Population of 3,000 people, single sex in 5-year age group

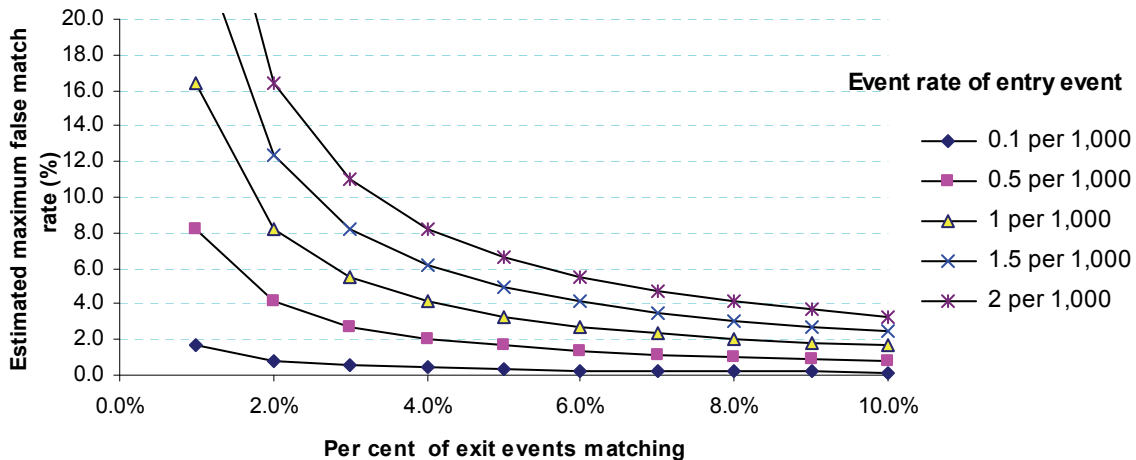

### Population of 1,000 people, single sex in 5-year age group

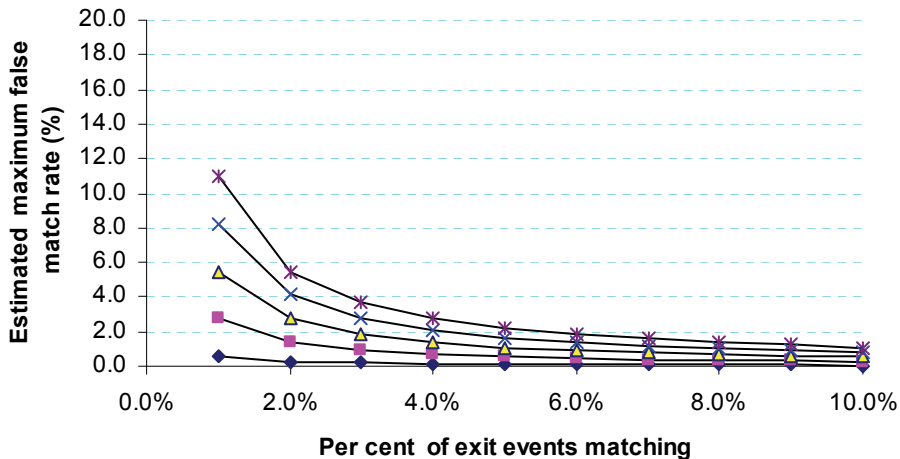

Supplement: MOESM2 [file 9534876]
